# Supplementary material
Source: HighWire-hosted journal article supplement (http://cmajopen.ca/highwire/filestream/84937/field_highwire_adjunct_files/3/2020-0183-4-at.pdf)
Supplement: 2020-0183-4-at.pdf [file 2020-0183-4-at.pdf]

Appendix 4. 2x2 tables for Case Definitions in BC CPCSSN vs Gold Standard (Chart Review)

|                |         | Gold Standard (Chart Review) |         |
|----------------|---------|------------------------------|---------|
|                |         | COPD                         | No COPD |
| Definition 1.1 | COPD    | 65                           | 16      |
|                | No COPD | 7                            | 223     |
| Definition 1.2 | COPD    | 67                           | 22      |
|                | No COPD | 5                            | 217     |
| Definition 2.1 | COPD    | 54                           | 17      |
|                | No COPD | 18                           | 222     |
| Definition 2.2 | COPD    | 66                           | 21      |
|                | No COPD | 6                            | 218     |
| Definition 2.3 | COPD    | 60                           | 13      |
|                | No COPD | 12                           | 226     |
| Definition 2.4 | COPD    | 13                           | 1       |
|                | No COPD | 59                           | 238     |
| Definition 2.5 | COPD    | 63                           | 19      |
|                | No COPD | 9                            | 220     |
| Definition 3.1 | COPD    | 58                           | 14      |
|                | No COPD | 14                           | 225     |
| Definition 3.2 | COPD    | 65                           | 20      |
|                | No COPD | 7                            | 219     |
| Definition 4.1 | COPD    | 67                           | 27      |
|                | No COPD | 5                            | 212     |
| Definition 4.2 | COPD    | 68                           | 31      |
|                | No COPD | 4                            | 208     |
| Definition 4.3 | COPD    | 67                           | 31      |
|                | No COPD | 5                            | 208     |
| Definition 5.1 | COPD    | 66                           | 17      |
|                | No COPD | 6                            | 222     |
| Definition 5.2 | COPD    | 67                           | 22      |
|                | No COPD | 5                            | 217     |
| Definition 5.3 | COPD    | 65                           | 20      |
|                | No COPD | 7                            | 219     |

Medication table (ATC codes)

|                                             |                          |
|---------------------------------------------|--------------------------|
| <b>ACE inhibitors</b>                       |                          |
| C09AA01                                     | Captopril                |
| C09AA02                                     | Enalapril                |
| C09AA03                                     | Lisinopril               |
| C09AA04                                     | Perindopril              |
| C09AA05                                     | Ramipril                 |
| C09AA06                                     | Quinapril                |
| C09AA07                                     | Benazepril               |
| C09AA09                                     | Cilazapril               |
| C09AA10                                     | Trandolapril             |
| <b>Angiotensin receptor blockers (ARBs)</b> |                          |
| C09CA01                                     | Losartan                 |
| C09CA02                                     | Eprosartan               |
| C09CA03                                     | Valsartan                |
| C09CA04                                     | Irbesartan               |
| C09CA06                                     | Candesartan              |
| C09CA07                                     | Telmisartan              |
| C09CA08                                     | Olmесartan medoxomil     |
| C09DX04                                     | Valsartan and sacubitril |
| <b>Beta blockers</b>                        |                          |
| C07AB02                                     | Metoprolol               |
| C07AB03                                     | Atenolol                 |
| C07AB04                                     | Acebutolol               |
| C07AB07                                     | Bisoprolol               |
| C07AB12                                     | Nebivolol                |
| C07AG02                                     | Carvedilol               |
| <b>Diuretic</b>                             |                          |
| C03DA01                                     | Spiroноlactone           |
| C03DA04                                     | Eplerenone               |
| C03CA01                                     | Furosemide               |
| C03BA11                                     | Indapamide               |
